1       **Megaplastids on the Rise: Combining Sequencing Approaches to**  
2       **Fully Resolve a Carbapenemase-Encoding Plasmid in a Proposed**  
3                                   **Novel *Pseudomonas* Species**

4  
5 João Botelho<sup>1\*</sup>, Cédric Lood<sup>2,3</sup>, Sally R. Partridge<sup>4</sup>, Vera van Noort<sup>2,5</sup>, Rob  
6 Lavigne<sup>3</sup>, Filipa Grosso<sup>1</sup>, Luísa Peixe<sup>1\*</sup>

7  
8 <sup>1</sup>UCIBIO/REQUIMTE, Laboratório de Microbiologia, Faculdade de  
9 Farmácia, Universidade do Porto, Porto, Portugal

10 <sup>2</sup>Centre of Microbial and Plant Genetics, Department of Microbial and  
11 Molecular Systems, KU Leuven, Leuven, Belgium

12 <sup>3</sup>Laboratory of Gene Technology, Department of Biosystems, KU Leuven,  
13 Leuven, Belgium

14 <sup>4</sup>Centre for Microbiology and Infectious Diseases, The Westmead Institute  
15 for Medical Research, The University of Sydney, Westmead Hospital,  
16 NSW 2145, Australia

17 <sup>5</sup>Institute of Biology, Leiden University, Leiden, The Netherlands

18

19 \*Addresses for correspondence: João Botelho, Laboratório de  
20 Microbiologia. Faculdade de Farmácia da Universidade do Porto, Rua  
21 Jorge Viterbo Ferreira nº 228, 4050-313 Porto, Portugal; phone: +351  
22 220428500; e-mail: [joabotelho9@hotmail.com](mailto:joabotelho9@hotmail.com); Luísa Peixe, Laboratório  
23 de Microbiologia. Faculdade de Farmácia da Universidade do Porto, Rua  
24 Jorge Viterbo Ferreira nº 228, 4050-313 Porto, Portugal; phone: +351  
25 220428500; e-mail: [lpeixe@ff.up.pt](mailto:lpeixe@ff.up.pt).

26

27 **Abstract**

28 Horizontal transfer of plasmids plays a pivotal role in the dissemination of antibiotic  
29 resistance genes and emergence of multidrug-resistant bacteria. Sequencing of plasmids  
30 is thus paramount for the success of accurate epidemiological tracking strategies in the  
31 hospital setting and routine surveillance. Here, we combine Nanopore and Illumina  
32 sequencing to fully assemble a carbapenemase-encoding megaplasmid carried by a  
33 clinical isolate belonging to a putative novel *Pseudomonas* species. FFUP\_PS\_41 has a  
34 multidrug resistance phenotype and was initially identified as *Pseudomonas putida*, but  
35 an average nucleotide identity below the cut-off for species delineation suggests a new  
36 species related to the *P. putida* phylogenetic group. FFUP\_PS\_41 harbors a 498,516-bp  
37 untypable megaplasmid (pJBCL41) with low similarity compared with publicly  
38 available plasmids. pJBCL41 contains a full set of genes for self-transmission and genes  
39 predicted to be responsible for plasmid replication, partitioning, maintenance and heavy  
40 metal resistance. pJBCL41 carries a class 1 integron with the  $|aacA7|bla_{VIM-2}|aacA4|$   
41 cassette array (In103) located within a defective Tn402-like transposon that forms part  
42 of a 50,273-bp mosaic region bound by 38-bp inverted repeats typical of the Tn3 family  
43 and flanked by 5-bp direct repeats. This region is composed of different elements,  
44 including additional transposon fragments, five insertion sequences and a Tn3-Derived  
45 Inverted-Repeat Miniature Element. The hybrid Nanopore/Illumina approach resulted in  
46 contiguous assemblies and allowed us to fully resolve a carbapenemase-encoding  
47 megaplasmid from *Pseudomonas* spp. The identification of novel megaplasmids will  
48 shed a new light on the evolutionary effects of gene transfer and the selective forces  
49 driving AR.

50 **Keywords:** *Pseudomonas*, megaplasmids, Nanopore, Illumina, antibiotic  
51 resistance

## 52 **Introduction**

53 Bacteria can become resistant to antibiotics through chromosomal mutations and by the  
54 acquisition of resistance genes carried on mobile genetic elements, including plasmids  
55 and integrative and conjugative elements [1]. Plasmids are autonomous self-replicating  
56 elements that drive the horizontal transfer (HGT) of antibiotic resistance genes from cell  
57 to cell by conjugation [2–5]. The mobility of a plasmid depends on the set of genes that  
58 it carries, and these extrachromosomal elements may be conjugative, mobilizable or  
59 non-transmissible [2, 3]. Conjugative plasmids carry all the machinery necessary for  
60 self-propagation: i) a relaxase, a key protein in conjugation; ii) an origin of transfer  
61 (*oriT*); iii) a set of genes encoding for the type-IV secretion system (T4SS); and iv) a  
62 gene encoding a type-IV coupling protein (T4CP) [2, 3]. Mobilizable plasmids lack the  
63 complete set of genes encoding the T4SS and may use the conjugative apparatus of a  
64 helper plasmid present in the cell to be successfully transferred. Conjugative plasmids  
65 tend to be low copy number and large, whereas mobilizable plasmids are frequently  
66 high copy number and smaller (<30 kb) [2, 3]. The term megaplasmids [6] has been  
67 used for very large replicons (>350 kb) which, in contrast to chromids [7], do not carry  
68 essential core genes. Megaplasmids frequently have mosaic structures, carrying genetic  
69 modules that originate from different ancestral sources [8]. The formation of mosaic  
70 plasmids may be influenced by several factors, such as the abundance of conjugative  
71 plasmids and transposons, selection pressures, incompatibility groups and the host's  
72 tolerance of foreign DNA. According to the plasmid hypothesis, megaplasmids are the  
73 evolutionary precursors of chromids, due to the amelioration of genomic signatures to  
74 those of the chromosomal partner and the acquisition of essential genes [7].

75 To date, fourteen incompatibility groups (IncP-1 to IncP-14) have been characterized  
76 amongst *Pseudomonas* plasmids [9, 10]. Narrow host range plasmids comprise IncP  
77 types -2, -5, -7, -10, -12 and -13 and cannot be transferred into *Escherichia coli*. In

78 contrast, other groups display a broad host range, as they are also included in the typing  
79 scheme for *Enterobacteriaceae* plasmids: IncP-1 (IncP), IncP-4 (IncQ) and IncP-6  
80 (IncG) [9, 10]. Unlike *Enterobacteriaceae* plasmids, no replicon-based PCR typing of  
81 *Pseudomonas* plasmids has been created yet.

82 Plasmids may harbor accessory module(s) that provide adaptive advantage(s) for their  
83 host, such as virulence-encoding factors and antibiotic resistance genes [9, 11–13].  
84 Sequencing of plasmids is thus paramount to the success of accurate epidemiological  
85 tracking strategy in the hospital setting and routine surveillance, helping to identify  
86 transmission routes and to prevent future outbreaks [14–19]. The advent of WGS has  
87 enabled the *in silico* analysis of a wide array of plasmids, most of them from assembly  
88 of short-read sequencing data [20–24]. However, fully resolving plasmids with short-  
89 read sequencing technologies remains challenging due to the presence of numerous long  
90 repeated regions [25], and currently the most accurate approach to assemble these  
91 plasmids is to use a combination of short-read and long-read methods [14–19, 26, 27].  
92 Here, we combined Nanopore and Illumina sequencing to fully assemble a  
93 carbapenemase-encoding megaplasmid carried by an isolate belonging to a putative  
94 novel *Pseudomonas* species.

## 95 **Material and Methods**

### 96 ***Bacterial Isolate***

97 Isolate FFUP\_PS\_41 was obtained in 2008 from endotracheal tube secretions of a  
98 patient with pneumonia admitted to the Neonatal/Pediatric Intensive Care unit of Centro  
99 Hospitalar do Porto - Hospital de Santo António, in Porto, Portugal, as part of regular  
100 surveillance of carbapenemase-producers among clinical isolates.

101 FFUP\_PS\_41 was initially identified as *Pseudomonas putida* by VITEK-2 (bioMérieux)  
102 and later re-classified by pair-wise average nucleotide identity based on BLAST+  
103 (ANIb) using JSpeciesWS v3.0.20 and PyANI v0.2.7  
104 (<https://github.com/widdowquinn/pyani>) [28–30]. Antimicrobial susceptibility testing  
105 was conducted by standard disc diffusion and broth microdilution (for colistin)  
106 methods, according to EUCAST guidelines (<http://www.eucast.org/>).

### 107 ***Whole-Plasmid Sequencing and Bioinformatics***

108 Genomic DNA from FFUP\_PS\_41 was extracted using a QIAamp DNA Mini Kit  
109 (Qiagen, Hilden, Germany) according to the manufacturer's instructions. Sequencing  
110 libraries were prepared using Illumina Nextera and the 1D ligation library approach  
111 from Oxford Nanopore Technology (ONT). Libraries were sequenced on the Illumina  
112 HiSeq 2500 sequencer or the MinION sequencer from ONT equipped with a flowcell of  
113 chemistry type R9.4, respectively.

114 Illumina reads were verified for quality using FastQC and Trimmomatic [31, 32], while  
115 MinION reads were processed with ONT's albacore v2.3.0 followed by demultiplexing  
116 using porechop v0.2.3. Both datasets were then combined using the Unicycler assembly  
117 pipeline [33] with a finishing step of Pilon v1.22. The assemblies were visually  
118 inspected using the assembly graph tool Bandage v0.8.1 [34]. Annotation of the  
119 megaplasmid was performed with Prokka v1.13 using default parameters [35]. To  
120 improve annotation, we downloaded additional files of trusted proteins from NCBI  
121 RefSeq plasmids (<ftp://ftp.ncbi.nih.gov/refseq/release/plasmid/>), the NCBI Bacterial  
122 Antimicrobial Resistance Reference Gene Database  
123 ([ftp://ftp.ncbi.nlm.nih.gov/pathogen/Antimicrobial\\_resistance/](ftp://ftp.ncbi.nlm.nih.gov/pathogen/Antimicrobial_resistance/)) and the Antibacterial  
124 Biocide- and Metal-Resistance Genes database (Bac-Met,  
125 <http://bacmet.biomedicine.gu.se/index.html>). EggNOG mapper v4.5.1 and NCBI's

126 Conserved Domain Database CDSEARCH/cdd v3.16 were used for functional  
127 annotation and conserved domain search of protein sequences, respectively [36–38].  
128 Inference of orthologous groups (OGs) was achieved with OrthoFinder v2.2.6 [39]. The  
129 coding sequence (CDS) annotations of the megaplasmid were visualized with Circos  
130 v0.69-6 [40]. We used ISfinder [41] to look for insertion sequences (IS). Antimicrobial  
131 resistance genes and associated mobile elements were annotated using Galileo<sup>TM</sup> AMR  
132 (<https://galileoamr.arcbio.com/mara/>) (Arc Bio, Cambridge, MA) [42]. Plasmid copy  
133 number was estimated based on coverage of the Illumina dataset. GenSkew  
134 (<http://genskew.csb.univie.ac.at/>) was used to compute and plot nucleotide skew data to  
135 predict the origin of replication.

#### 136 ***Accession Number***

137 The sequence of plasmid pJBCL41 was deposited in GenBank with accession number  
138 MK496050.

#### 139 **Results**

##### 140 ***Antimicrobial Susceptibility and Taxonomy testing***

141 Clinical isolate FFUP\_PS\_41 has a multidrug resistance (MDR) phenotype, showing  
142 resistance to imipenem, meropenem, ceftazidime, cefepime, aztreonam,  
143 piperacilin+tazobactam, gentamicin, tobramycin, amikacin, ciprofloxacin but remains  
144 susceptible to colistin (MIC=1 mg/L). FFUP\_PS\_41 was initially identified as *P. putida*  
145 by VITEK-2. However, it displays an ANI value below the cut-off for species  
146 identification (95%) [28] when compared with the complete genome of type strains  
147 belonging to the *Pseudomonas* genus, suggesting that it represents a new species related  
148 to the *P. putida* phylogenetic group.

149 ***Comparative Megaplasmidomics Between pJBCL41 and Related Pseudomonas***

150 ***Plasmids***

151 Using a hybrid assembly approach, we were able to fully resolve a mosaic megaplasmid  
152 (named pJBCL41) carried by *Pseudomonas* sp. FFUP\_PS\_41 (**Figure S1**). pJBCL41 is  
153 498,516 bp and a total of 608 predicted CDS were annotated (**Figure 1**). It has an  
154 average GC content of 56.0%, which is lower than that observed for the chromosome  
155 (62.6%) and the mean content for strains identified as *P. putida* (62.0%, according to  
156 information retrieved on the 08/03/2019 on  
157 <https://www.ezbiocloud.net/taxon?tn=Pseudomonas%20putida>).

158 NCBI's CDD calls 42.1% (256) of the predicted CDS for pJBCL41 (**Table S1**),  
159 indicating that most genes encode proteins of unknown function. The backbone of this  
160 megaplasmid harbours genes predicted to be responsible for plasmid replication, heavy  
161 metal resistance and carries two predicted type-II toxin-antitoxin (TA) systems and  
162 genes encoding for partition systems (**Figure 1**) [43]. Several genes encoding transport  
163 and metabolic processes, as well as transposable elements and CDS associated with  
164 transcription, regulatory, chemotaxis signal transduction and mobility functions could  
165 be identified. These traits are frequently overrepresented on large plasmids (**Figure 2**)  
166 [6, 44]. Also, pJBCL41 harbours several genes coding for the synthesis of DNA  
167 precursors, which may promote replication and transcription processes to alleviate the  
168 burden that this acquired element may impose on the host cell.

169 pJBCL41 has low nucleotide sequence identity with *Pseudomonas* megaplasmid  
170 deposited in public databases (**Table 1** and **Figure S2**). OrthoFinder assigned 59.4% of  
171 proteins encoded by pJBCL41 and the most closely-related plasmid, pQBR103 from  
172 *Pseudomonas fluorescens* [45] into 335 OGs (**Table S2**). pQBR103 was found in  
173 *Pseudomonas* populations colonizing the leaf and root surfaces of sugar beet plants  
174 growing at Wytham, United Kingdom and carried no antimicrobial resistance genes

175 [45]. Curiously, a blastp analysis between the proteins encoded by these megaplasמידs  
176 revealed that the average amino acid sequence identity is 72.8% among sequences  
177 producing significant alignments.

178 Large plasmids identified among the *Pseudomonas* genus usually belong to the IncP-2  
179 incompatibility group [10, 21, 24]. However, the IncP-2-type  
180 stability/replication/conjugal transfer system is absent from pJBCL41 as previously  
181 observed for other megaplasמידs carried by different *Pseudomonas* species [46, 47].  
182 Two replication proteins could be identified here. One replicase gene is located at  
183 458,679 bp on the plasmid and is close to predicted the origin of replication (**Figure**  
184 **S3**). pJBCL41 is estimated to be present as a single copy, from read coverage vs. the  
185 chromosome. Like many megaplasמידs, pJBCL41 appears to possess a full set of genes  
186 for self-transmission [2, 3]. We identified a cluster of genes encoding an F-type T4SS,  
187 encompassing i) a gene encoding a TraD homolog, an AAA+ ATPase of the pfamVirD4  
188 type, known as the T4CP and which is a key protein in conjugation; ii) a gene encoding  
189 a TraI relaxase homolog, which together with accessory proteins is responsible for  
190 cleaving the plasmid in a site-specific manner to initiate DNA transfer and iii) a set of  
191 genes (*traEFGKNV* homologues) coding for the mating pair formation system  
192 responsible for pilus assembly and retraction (**Figure 1**) [2, 3, 48].

### 193 ***pJBCL41 Carries a Complex 50 kb Multidrug Resistance Region***

194 The plasmid pJBCL41 carries genes typically found on IncP-2 encoding resistance to  
195 tellurite, which could allow co-selection and enrichment of bacteria with MDR plasmids  
196 [49]. It also harbours a class 1 integron with the  $|aacA7|bla_{VIM-2}|aacA4|$  cassette array  
197 (named In103 by INTEGRALL [50]) (**Figure 3**): *aacA7* confers resistance to  
198 aminoglycosides and *bla<sub>VIM-2</sub>* encodes resistance to  $\beta$ -lactams (including carbapenems).  
199 The *aacA4* gene cassette has a C residue at nucleotide position 329, encoding a serine



200 associated with gentamicin resistance [51]. The same cassette array has been observed  
201 previously among isolates from Portuguese hospitals [22]. The integron is of the In4  
202 type, with a complete 5'-CS bounded by the 25 bp inverted repeat IR<sub>i</sub>, 2,239 bp of the  
203 3'-CS and IS6100 flanked by two fragments of the IR<sub>t</sub> end of Tn402 [9, 52]. As the  
204 region between IR<sub>i</sub> and IR<sub>t</sub> lacks *tni* transposition genes, this constitutes a Tn402-like  
205 transposon that would be defective in self-transposition.

206 This defective Tn402-like transposon is flanked by 5-bp direct repeats (5'-CTGCT-3')  
207 (**Figure 3**), suggesting integration by transposition close to the predicted resolution  
208 (*res*) site of a Tn3-family transposon. About 300 bp at the IR<sub>L</sub> end of the transposon are  
209 related (~86% identical) to TnAsI (ISfinder), followed by a region containing a gene  
210 which may encode a methyl-accepting chemotaxis protein. From the predicted  
211 recombination crossover point in the *res* site the sequence matches TnPa40 (ISfinder).  
212 This “hybrid” transposon is not flanked by characteristic 5 bp DR but the 5 bp adjacent  
213 to IR<sub>L</sub> (5'-AGGTA-3') are repeated 50,273 bp away, immediately adjacent to the 38 bp  
214 repeat of a 1,100 bp transposon fragment ~97% identical to part of both Tn1721  
215 (GenBank accession no. X61367.1, [53]) and TnAsI (**Figure 3**). This transposon is  
216 truncated by 261 bp region that apparently corresponds to a Tn3-Derived Inverted-  
217 Repeat Miniature Element (designated TIME-262.1 here). TIMEs are non-autonomous  
218 mobile elements commonly found in *Pseudomonas* spp. [54].

219 Most of the region between these transposon elements consists of a 16,782 bp segment  
220 flanked by directly oriented copies of ISPst3 (IS21 family). This region, except for  
221 insertion of ISPa82 (IS66 family) and an adjacent deletion in pJBCL41, matches several  
222 *Pseudomonas* chromosomes (e.g. *P. aeruginosa* PA7 in **Figure S4**) and different parts  
223 of it are found in plasmids in *Pseudomonas*, *Acinetobacter* and *Enterobacteriaceae*,  
224 sometimes also flanked by IS. The sequence between TnPa40 and the left-hand ISPst3

225 in pJBCL41 is a duplication of part of the 16,782 bp region, with *ISPa1635* (IS4 family)  
226 inserted, flanked by characteristic 8 bp DR, instead of *ISPa82* and ends with a partial  
227 *ISPa1635*. The right-hand *ISPst3* truncates a transposon related to TnAs2 [55], which is  
228 separated from TIME-261.1 by a 9,075 bp region that also matches *Pseudomonas*  
229 chromosomes and includes a putative aminoglycoside phosphotransferase gene.

230 Blast searches with the complete 50 kb region identified a 59 kb region in the  
231 chromosome of *P. aeruginosa* AR\_0440 (GenBank accession no. CP029148.1) that has  
232 similar ends, but lacks an integron, with an additional Tn5393 insertion and a different  
233 region in place of the *ISPst3*-bounded segment (**Figure S4**). This 59 kb region is  
234 flanked by 5 bp DR (5'-AATGA-3') and an uninterrupted version of the flanking  
235 sequence matches other *Pseudomonas* chromosomes.

236 A Tn5503-like transposon encoding a type-II TA system and two metal dependent  
237 phosphohydrolases is also inserted in pJBCL41 [56] and is flanked by 5-bp DR (5'-  
238 ACTCT-3'), indicating that this element transposed independently of the 50-kb region  
239 (**Figure 3**). It has only 10 nucleotide differences from the original Tn5503 on plasmid  
240 Rms149, the archetype of *Pseudomonas* plasmid incompatibility group IncP-6 [56], and  
241 additional copies of short repeats in a GC-rich region within a gene encoding an ATP-  
242 utilizing enzyme. An additional *ISPst3*, five *ISPpu7* (IS21 family) and one *ISPa41* (IS5  
243 family) all flanked by DR of characteristic length, are also inserted in the pJBCL41  
244 backbone (**Figures 1 and 3**).

## 245 Discussion

246 In this study, we took advantage of a hybrid assembly approach to fully resolve and  
247 characterize a carbapenemase-encoding megaplasmid and to compare it with related  
248 *Pseudomonas* megaplasmids. The lower GC content of pJBCL41 compared with the  
249 FFUP\_PS\_41 chromosome and strains identified as *P. putida* may be related to a more

250 relaxed selection acting on these secondary replicons, as the maintenance of GC-rich  
251 genomes is energetically more demanding [57, 58]. Ongoing studies will help to  
252 characterize the biology and genomic signatures related to this new putative  
253 *Pseudomonas* species (Botelho *et al*, unpublished data).

254 Since secondary replicons are under strong pressure to undergo genomic reshuffling  
255 [57], the observed low nucleotide sequence identity between pJBCL41 megaplastids  
256 and large *Pseudomonas* plasmids deposited in public databases might be expected. Even  
257 though pJBCL41 and pQBR103 plasmids are similar in size and functionalities, there is  
258 a high level of divergence between genes encoding related proteins. Indeed, it is rare to  
259 identify megaplastids with a similar nucleotide sequence in strains belonging to  
260 different species within the same genus [6, 47]. These results suggest that pJBCL41 and  
261 pQBR103 may share a common ancestor, but independent evolutionary trajectories  
262 have led to significant diversification among related genes. The presence of different  
263 replicons suggests that pJBCL41 may have resulted from co-integration of distinct  
264 plasmid modules. The replication module defines plasmid copy number and plasmid  
265 survival in several hosts. Low copy-number plasmids are more frequently lost, due to  
266 random assortment at cell division [2, 3] and extra stability modules, such as TA and  
267 partition systems, may be required to ensure that large plasmids such as pJBCL41 are  
268 maintained [43, 59].

269 The DR flanking the 50-kb region in pJBCL41 and the related 59-kb region in the *P.*  
270 *aeruginosa* AR\_0440 chromosome could reflect insertion of each region by  
271 transposition, possibly mediated by the intact transposase and resolvase of Tn*Pa40*.

272 However, the size, complexity and differences the internal parts of these related regions  
273 may be more consistent with initial insertion of a simple transposon followed by further  
274 insertions, deletions and rearrangements. A similar situation is seen in plasmid pCTX-

275 M360, which carries a complete Tn2 flanked by the 5 bp DR, and the highly-related  
276 pCTX-M3, in which the ends of Tn2 are present in the same position but the central part  
277 of the transposon has undergone extensive rearrangements [60]. The identification of all  
278 or part of the 16,782 bp segment found within the 50 kb region in pJBCL41 in other  
279 locations also suggests that some of the genes it carries may encode advantageous  
280 functions, but this needs further analysis. Identification of other sequences related to  
281 parts of these 50-kb and 59-kb region segments may also shed light on how they have  
282 arisen and evolved.

283 To sum up, we show that a hybrid Nanopore/Illumina approach is useful for producing  
284 contiguous assemblies and allowed full resolution of a carbapenemase-encoding  
285 *Pseudomonas* megaplasmid. The presence of this large plasmid may provide a selective  
286 advantage to the host cell. However, given their size and gene content, acquisition of  
287 these secondary replicons may pose a significant cost [61–63]. The high level of gene  
288 variation when compared to publicly available megaplasmids suggests that these  
289 secondary replicons frequently undergo gene loss and gain through HGT. The reduced  
290 purifying selection and the high prevalence of transposable elements frequently  
291 observed on megaplasmids may help to explain why these elements readily acquire  
292 foreign DNA [6, 57, 64]. In fact, mosaic plasmids such as pJBCL41 and the majority of  
293 megaplasmids have a high proportion of mobile genetic elements [8]. The identification  
294 of novel megaplasmids may shed light on the evolutionary effects of gene transfer and  
295 the selective forces driving antibiotic resistance.

## 296 **Acknowledgments**

297 This work was supported by the Applied Molecular Biosciences Unit- UCIBIO which is  
298 financed by national funds from FCT/MCTES (UID/Multi/04378/2019). JB and FG were  
299 supported by grants from Fundação para a Ciência e a Tecnologia (SFRH/BD/104095/2014 and

300 SFRH/BPD/95556/2013, respectively). CL is supported by an SB PhD fellowship from FWO  
301 Vlaanderen (1S64718N).

302 **Conflict of interest**

303 SRP is responsible for updating the Galileo™ AMR database for Arc Bio.

304

305 **References**

306 1. Alekshun MN, Levy SB. Molecular Mechanisms of Antibacterial Multidrug  
307 Resistance. *Cell* 2007; **128**: 1037–1050.

308 2. Smillie C, Garcillán-Barcia MP, Francia MV, Rocha EPC, de la Cruz F. Mobility  
309 of plasmids. *Microbiol Mol Biol Rev* 2010; **74**: 434–52.

310 3. Garcillán-Barcia MP, Alvarado A, de la Cruz F. Identification of bacterial  
311 plasmids based on mobility and plasmid population biology. *FEMS Microbiol*  
312 *Rev* 2011; **35**: 936–956.

313 4. Shintani M, Sanchez ZK, Kimbara K. Genomics of microbial plasmids:  
314 classification and identification based on replication and transfer systems and  
315 host taxonomy. *Front Microbiol* 2015; **6**: 242.

316 5. Orlek A, Stoesser N, Anjum MF, Doumith M, Ellington MJ, Peto T, et al.  
317 Plasmid Classification in an Era of Whole-Genome Sequencing: Application in  
318 Studies of Antibiotic Resistance Epidemiology. *Front Microbiol* 2017; **8**: 182.

319 6. diCenzo GC, Finan TM. The Divided Bacterial Genome: Structure, Function, and  
320 Evolution. *Microbiol Mol Biol Rev* 2017; **81**: e00019-17.

321 7. Harrison PW, Lower RPJ, Kim NKD, Young JPW. Introducing the bacterial

- 322 'chromid': not a chromosome, not a plasmid. *Trends Microbiol* 2010; **18**: 141–  
323 148.
- 324 8. Pesesky MW, Tilley R, Beck DAC. Mosaic Plasmids are Abundant and  
325 Unevenly Distributed Across Prokaryotic Taxa. *bioRxiv* 2018; 428219.
- 326 9. Partridge SR, Kwong SM, Firth N, Jensen SO. Mobile Genetic Elements  
327 Associated with Antimicrobial Resistance. *Clin Microbiol Rev* 2018; **31**: e00088-  
328 17.
- 329 10. Thomas CM, Haines AS. Plasmids of the Genus *Pseudomonas*. *Pseudomonas*.  
330 2004. Springer US, Boston, MA, pp 197–231.
- 331 11. San Millan A. Evolution of Plasmid-Mediated Antibiotic Resistance in the  
332 Clinical Context. *Trends Microbiol* 2018; **0**.
- 333 12. Diene SM, Rolain J-M. Carbapenemase genes and genetic platforms in Gram-  
334 negative bacilli: Enterobacteriaceae, *Pseudomonas* and *Acinetobacter* species.  
335 *Clin Microbiol Infect* 2014; **20**: 831–838.
- 336 13. Rozwandowicz M, Brouwer MSM, Fischer J, Wagenaar JA, Gonzalez-Zorn B,  
337 Guerra B, et al. Plasmids carrying antimicrobial resistance genes in  
338 Enterobacteriaceae. *J Antimicrob Chemother* 2018; **73**: 1121–1137.
- 339 14. Greig DR, Dallman TJ, Hopkins KL, Jenkins C. MinION nanopore sequencing  
340 identifies the position and structure of bacterial antibiotic resistance determinants  
341 in a multidrug-resistant strain of enteroaggregative *Escherichia coli*. *Microb*  
342 *Genomics* 2018.
- 343 15. Phan HTT, Stoesser N, Maciuca IE, Toma F, Szekely E, Flonta M, et al. Illumina

- 344 short-read and MinION long-read WGS to characterize the molecular  
345 epidemiology of an NDM-1 *Serratia marcescens* outbreak in Romania. *J*  
346 *Antimicrob Chemother* 2018; **73**: 672–679.
- 347 16. Dong N, Lin D, Zhang R, Chan EW-C, Chen S. Carriage of blaKPC-2 by a  
348 virulence plasmid in hypervirulent *Klebsiella pneumoniae*. *J Antimicrob*  
349 *Chemother* 2018.
- 350 17. Ludden C, Reuter S, Judge K, Gouliouris T, Blane B, Coll F, et al. Sharing of  
351 carbapenemase-encoding plasmids between Enterobacteriaceae in UK sewage  
352 uncovered by MinION sequencing. *Microb Genomics* 2017; **3**: e000114.
- 353 18. George S, Pankhurst L, Hubbard A, Votintseva A, Stoesser N, Sheppard AE, et  
354 al. Resolving plasmid structures in Enterobacteriaceae using the MinION  
355 nanopore sequencer: assessment of MinION and MinION/Illumina hybrid data  
356 assembly approaches. *Microb Genomics* 2017; **3**: e000118.
- 357 19. Lemon JK, Khil PP, Frank KM, Dekker JP. Rapid Nanopore Sequencing of  
358 Plasmids and Resistance Gene Detection in Clinical Isolates. *J Clin Microbiol*  
359 2017; **55**: 3530–3543.
- 360 20. Botelho J, Grosso F, Peixe L. Characterization of the pJB12 Plasmid from  
361 *Pseudomonas aeruginosa* Reveals Tn6352, a Novel Putative Transposon  
362 Associated with Mobilization of the blaVIM-2-Harboring In58 Integron.  
363 *Antimicrob Agents Chemother* 2017; **61**: e02532-16.
- 364 21. Botelho J, Grosso F, Quinteira S, Mabrouk A, Peixe L. The complete nucleotide  
365 sequence of an IncP-2 megaplasmid unveils a mosaic architecture comprising a  
366 putative novel blaVIM-2-harboring transposon in *Pseudomonas aeruginosa*. *J*

- 367            *Antimicrob Chemother* 2017; **72**: 2225–2229.
- 368    22.    Botelho J, Grosso F, Quinteira S, Brilhante M, Ramos H, Peixe L. Two decades  
369            of blaVIM-2-producing *Pseudomonas aeruginosa* dissemination: an interplay  
370            between mobile genetic elements and successful clones. *J Antimicrob Chemother*  
371            2018; **73**: 873–882.
- 372    23.    Bonnin RA, Poirel L, Nordmann P, Eikmeyer FG, Wibberg D, Pühler A, et al.  
373            Complete sequence of broad-host-range plasmid pNOR-2000 harbouring the  
374            metallo- $\beta$ -lactamase gene blaVIM-2 from *Pseudomonas aeruginosa*. *J Antimicrob*  
375            *Chemother* 2013; **68**: 1060–1065.
- 376    24.    Xiong J, Alexander DC, Ma JH, Déraspe M, Low DE, Jamieson FB, et al.  
377            Complete sequence of pOZ176, a 500-kilobase IncP-2 plasmid encoding IMP-9-  
378            mediated carbapenem resistance, from outbreak isolate *Pseudomonas aeruginosa*  
379            96. *Antimicrob Agents Chemother* 2013; **57**: 3775–82.
- 380    25.    Arredondo-Alonso S, Willems RJ, van Schaik W, Schürch AC. On the  
381            (im)possibility of reconstructing plasmids from whole-genome short-read  
382            sequencing data. *Microb Genomics* 2017; **3**: e000128.
- 383    26.    T'Syen J, Raes B, Horemans B, Tassoni R, Leroy B, Lood C, et al. Catabolism of  
384            the groundwater micropollutant 2,6-dichlorobenzamide beyond 2,6-  
385            dichlorobenzoate is plasmid encoded in *Aminobacter* sp. MSH1. *Appl Microbiol*  
386            *Biotechnol* 2018; **102**: 7963–7979.
- 387    27.    Albers P, Lood C, Öztürk B, Horemans B, Lavigne R, van Noort V, et al.  
388            Catabolic task division between two near-isogenic subpopulations co-existing in  
389            a herbicide-degrading bacterial consortium: consequences for the interspecies



- 390 consortium metabolic model. *Environ Microbiol* 2018; **20**: 85–96.
- 391 28. Varghese NJ, Mukherjee S, Ivanova N, Konstantinidis KT, Mavrommatis K,  
392 Kyrpides NC, et al. Microbial species delineation using whole genome  
393 sequences. *Nucleic Acids Res* 2015; **43**: 6761–71.
- 394 29. Richter M, Rosselló-Móra R, Oliver Glöckner F, Peplies J. JSpeciesWS: a web  
395 server for prokaryotic species circumscription based on pairwise genome  
396 comparison. *Bioinformatics* 2016; **32**: 929–931.
- 397 30. Pritchard L, Glover RH, Humphris S, Elphinstone JG, Toth IK. Genomics and  
398 taxonomy in diagnostics for food security: soft-rotting enterobacterial plant  
399 pathogens. *Anal Methods* 2016; **8**: 12–24.
- 400 31. Andrews S. FastQC A Quality Control tool for High Throughput Sequence Data.  
401 <http://www.bioinformatics.babraham.ac.uk/projects/fastqc/> .
- 402 32. Bolger AM, Lohse M, Usadel B. Trimmomatic: a flexible trimmer for Illumina  
403 sequence data. *Bioinformatics* 2014; **30**: 2114–20.
- 404 33. Wick RR, Judd LM, Gorrie CL, Holt KE. Unicycler: Resolving bacterial genome  
405 assemblies from short and long sequencing reads. *PLOS Comput Biol* 2017; **13**:  
406 e1005595.
- 407 34. Wick RR, Schultz MB, Zobel J, Holt KE. Bandage: interactive visualization of  
408 *de novo* genome assemblies: Fig. 1. *Bioinformatics* 2015; **31**: 3350–3352.
- 409 35. Seemann T. Prokka: rapid prokaryotic genome annotation. *Bioinformatics* 2014;  
410 **30**: 2068–2069.

- 411 36. Marchler-Bauer A, Derbyshire MK, Gonzales NR, Lu S, Chitsaz F, Geer LY, et  
412 al. CDD: NCBI's conserved domain database. *Nucleic Acids Res* 2015; **43**:  
413 D222–D226.
- 414 37. Marchler-Bauer A, Bo Y, Han L, He J, Lanczycki CJ, Lu S, et al.  
415 CDD/SPARCLE: functional classification of proteins via subfamily domain  
416 architectures. *Nucleic Acids Res* 2017; **45**: D200–D203.
- 417 38. Huerta-Cepas J, Szklarczyk D, Forslund K, Cook H, Heller D, Walter MC, et al.  
418 eggNOG 4.5: a hierarchical orthology framework with improved functional  
419 annotations for eukaryotic, prokaryotic and viral sequences. *Nucleic Acids Res*  
420 2016; **44**: D286–D293.
- 421 39. Emms DM, Kelly S. OrthoFinder: solving fundamental biases in whole genome  
422 comparisons dramatically improves orthogroup inference accuracy. *Genome Biol*  
423 2015; **16**: 157.
- 424 40. Krzywinski M, Schein J, Birol I, Connors J, Gascoyne R, Horsman D, et al.  
425 Circos: an information aesthetic for comparative genomics. *Genome Res* 2009;  
426 **19**: 1639–45.
- 427 41. Siguier P, Perochon J, Lestrade L, Mahillon J, Chandler M. ISfinder: the  
428 reference centre for bacterial insertion sequences. *Nucleic Acids Res* 2006; **34**:  
429 D32–D36.
- 430 42. Partridge SR, Tsafnat G. Automated annotation of mobile antibiotic resistance in  
431 Gram-negative bacteria: the Multiple Antibiotic Resistance Annotator (MARA)  
432 and database. *J Antimicrob Chemother* 2018; **73**: 883–890.

- 433 43. Díaz-Orejas R, Espinosa M, Yeo CC. The Importance of the Expendable: Toxin–  
434 Antitoxin Genes in Plasmids and Chromosomes. *Front Microbiol* 2017; **8**: 1479.
- 435 44. Janssen PJ, Van Houdt R, Moors H, Monsieurs P, Morin N, Michaux A, et al.  
436 The Complete Genome Sequence of *Cupriavidus metallidurans* Strain CH34, a  
437 Master Survivalist in Harsh and Anthropogenic Environments. *PLoS One* 2010;  
438 **5**: e10433.
- 439 45. Tett A, Spiers AJ, Crossman LC, Ager D, Ciric L, Dow JM, et al. Sequence-  
440 based analysis of pQBR103; a representative of a unique, transfer-proficient  
441 mega plasmid resident in the microbial community of sugar beet. *ISME J* 2007;  
442 **1**: 331–340.
- 443 46. Sun F, Zhou D, Wang Q, Feng J, Feng W, Luo W, et al. Genetic characterization  
444 of a novel *bla*<sub>DIM-2</sub>-carrying megaplasmid p12969-DIM from clinical  
445 *Pseudomonas putida*. *J Antimicrob Chemother* 2016; **71**: 909–912.
- 446 47. Smith BA, Leligdon C, Baltrus DA. Just the Two of Us? A Family of  
447 *Pseudomonas* Megaplasms Offers a Rare Glimpse Into the Evolution of 2  
448 Large Mobile Elements.
- 449 48. Thomson NR, Cerdeño-Tárraga AM, Brown CJ, Frost LS. Annotation of plasmid  
450 genes. *Plasmid* 2017; **91**: 61–67.
- 451 49. Gullberg E, Albrecht LM, Karlsson C, Sandegren L, Andersson DI. Selection of  
452 a multidrug resistance plasmid by sublethal levels of antibiotics and heavy  
453 metals. *MBio* 2014; **5**: e01918-14.
- 454 50. Moura A, Soares M, Pereira C, Leitao N, Henriques I, Correia A. INTEGRALL:

- 455 a database and search engine for integrons, integrases and gene cassettes.  
456 *Bioinformatics* 2009; **25**: 1096–1098.
- 457 51. Tsafnat G, Coptly J, Partridge SR. RAC: Repository of Antibiotic resistance  
458 Cassettes. *Database (Oxford)* 2011; **2011**: bar054.
- 459 52. Partridge SR, Brown HJ, Stokes HW, Hall RM. Transposons Tn1696 and Tn21  
460 and Their Integrons In4 and In2 Have Independent Origins. *Antimicrob Agents*  
461 *Chemother* 2001; **45**: 1263–1270.
- 462 53. Allmeier H, Cresnar B, Greck M, Schmitt R. Complete nucleotide sequence of  
463 Tn1721: gene organization and a novel gene product with features of a  
464 chemotaxis protein. *Gene* 1992; **111**: 11–20.
- 465 54. Szuplewska M, Czarnecki J, Bartosik D. Autonomous and non-autonomous Tn 3  
466 -family transposons and their role in the evolution of mobile genetic elements.  
467 *Mob Genet Elements* 2014; **4**: 1–4.
- 468 55. Pfeiffer F, Zamora-Lagos M-A, Blettinger M, Yeroslaviz A, Dahl A, Gruber S, et  
469 al. The complete and fully assembled genome sequence of *Aeromonas*  
470 *salmonicida* subsp. *pectinolytica* and its comparative analysis with other  
471 *Aeromonas* species: investigation of the mobilome in environmental and  
472 pathogenic strains. *BMC Genomics* 2018; **19**: 20.
- 473 56. Haines AS, Jones K, Cheung M, Thomas CM. The IncP-6 plasmid Rms149  
474 consists of a small mobilizable backbone with multiple large insertions. *J*  
475 *Bacteriol* 2005; **187**: 4728–38.
- 476 57. Cooper VS, Vohr SH, Wrocklage SC, Hatcher PJ. Why Genes Evolve Faster on

- 477           Secondary Chromosomes in Bacteria. *PLoS Comput Biol* 2010; **6**: e1000732.
- 478   58.   Rocha EPC, Danchin A. Base composition bias might result from competition for  
479           metabolic resources. *Trends Genet* 2002; **18**: 291–294.
- 480   59.   Baxter JC, Funnell BE. Plasmid Partition Mechanisms. *Microbiol Spectr* 2014; **2**.
- 481   60.   Zhu W, Luo L, Wang J, Zhuang X, Zhong L, Liao K, et al. Complete nucleotide  
482           sequence of pCTX-M360, an intermediate plasmid between pEL60 and pCTX-  
483           M3, from a multidrug-resistant *Klebsiella pneumoniae* strain isolated in China.  
484           *Antimicrob Agents Chemother* 2009; **53**: 5291–3.
- 485   61.   Romanchuk A, Jones CD, Karkare K, Moore A, Smith BA, Jones C, et al. Bigger  
486           is not always better: Transmission and fitness burden of ~1 MB *Pseudomonas*  
487           *syringae* megaplasmid pMPPla107. *Plasmid* 2014; **73**: 16–25.
- 488   62.   Dougherty K, Smith BA, Moore AF, Maitland S, Fanger C, Murillo R, et al.  
489           Multiple Phenotypic Changes Associated with Large-Scale Horizontal Gene  
490           Transfer. *PLoS One* 2014; **9**: e102170.
- 491   63.   San Millan A, MacLean RC. Fitness Costs of Plasmids: a Limit to Plasmid  
492           Transmission. *Microbiol Spectr* 2017; **5**.
- 493   64.   Rankin DJ, Rocha EPC, Brown SP. What traits are carried on mobile genetic  
494           elements and why? *Heredity (Edinb)* 2011; **106**: 1–10.
- 495
- 496
- 497
- 498

499

500

501 **Table 1.** Blastn results between pJBCL41 and related megaplasmids.

| Plasmid identifier | Max score | Total score | Query cover | E value | Ident (%) | Species               | Genbank accession | Size (bp) | Year of isolation | Source      | Country        |
|--------------------|-----------|-------------|-------------|---------|-----------|-----------------------|-------------------|-----------|-------------------|-------------|----------------|
| <b>pQBR103</b>     | 11073     | 1.06E+05    | 44%         | 0       | 72.99%    | <i>P. fluorescens</i> | NC_009444.1       | 425094    | 2008              | Environment | United Kingdom |
| <b>XWY-1</b>       | 10059     | 1.22E+05    | 9%          | 0       | 99.59%    | <i>P. sp.</i>         | NZ_CP026333.1     | 394537    | 2016              | Environment | China          |
| <b>pJB37</b>       | 7285      | 43666       | 17%         | 0       | 99.90%    | <i>P. aeruginosa</i>  | KY494864.1        | 464804    | 2008              | Clinical    | Portugal       |
| <b>pSY153</b>      | 6131      | 1.41E+05    | 20%         | 0       | 99.85%    | <i>P. putida</i>      | KY883660.1        | 468170    | 2012              | Clinical    | China          |
| <b>pOZ176</b>      | 6129      | 77698       | 19%         | 0       | 99.71%    | <i>P. aeruginosa</i>  | KC543497.1        | 500839    | 2000              | Clinical    | China          |
| <b>pBM413</b>      | 5306      | 51713       | 17%         | 0       | 99.93%    | <i>P. aeruginosa</i>  | CP016215.1        | 423017    | 2012              | Clinical    | China          |
| <b>RW109</b>       | 4728      | 41531       | 17%         | 0       | 71.75%    | <i>P. aeruginosa</i>  | NZ_LT969519.1     | 555265    | NA                | Industrial  | NA             |
| <b>P19E3</b>       | 4715      | 28494       | 15%         | 0       | 71.79%    | <i>P. koreensis</i>   | NZ_CP027478.1     | 467568    | 2014              | Environment | Switzerland    |
| <b>AR439</b>       | 4697      | 39223       | 16%         | 0       | 71.79%    | <i>P. aeruginosa</i>  | NZ_CP029096.1     | 437392    | NA                | Clinical    | NA             |

NA stands for no available data

502 **Figure 1.** Circular representation of genomic features of pJBCL41. The innermost circle  
503 is a histogram of the GC skew, the next a graph of GC content. The next circle displays  
504 selected regions of interest (yellow) and IS and transposons or related elements (grey).  
505 Red dots highlight genes encoding for antibiotic resistance. The next two circles  
506 represent the coding regions on the negative and positive strands colored by their  
507 functional annotation (when available). The outermost circle displays regions with high  
508 levels of identity to pQBR103 (GenBank accession no. NC\_009444.1).

509

510 **Figure 2.** Functional characterization of pJBCL41 and related megaplasmids. COG  
511 stands for Cluster of Orthologous Groups.

512

513 **Figure 3.** Map of resistance genes and mobile genetic elements inserted in the backbone  
514 of pJBLC41. Gene cassettes are shown as blue boxes labelled with the cassette name  
515 and are oriented in the 5'-CS to 3'-CS direction. IS are shown as block arrows labelled  
516 with the IS name/number, with the pointed end corresponding to IR<sub>R</sub>. TIME-261.1 and  
517 fragments of Tn3-family transposons are shown as beige boxes with 38 bp IR  
518 represented by flags. The fragment annotated as “TnAs1-like” is ~97% identical to a  
519 region in common between Tn1721 (GenBank accession no. X61367.1) and TnAs1 in  
520 ISfinder. The fragment annotated as “TnAs2-like” is ~94% identical to TnAs2 in  
521 ISfinder. The integron is inserted in a proposed hybrid transposon, apparently created  
522 by *res*-mediated recombination between a *tnp* region matching TnPa40 and another  
523 transposon, labelled “Tn”, that is ~86% identical to TnAs1 over the ~300 bp at the IR<sub>L</sub>  
524 end only. Direct repeats are shown as a pair of ‘lollipops’ of the same colour flanking an  
525 IS or a pair of IRs (but note that the same colour may be used to indicate more than one  
526 pair of DR), with sequences indicated for DR of transposons. Mobile elements are



527 shown to scale and numbers below dashed red lines indicate the lengths of intervening  
528 regions in bp. This figure was constructed from diagrams generated using Galileo<sup>TM</sup>  
529 AMR.



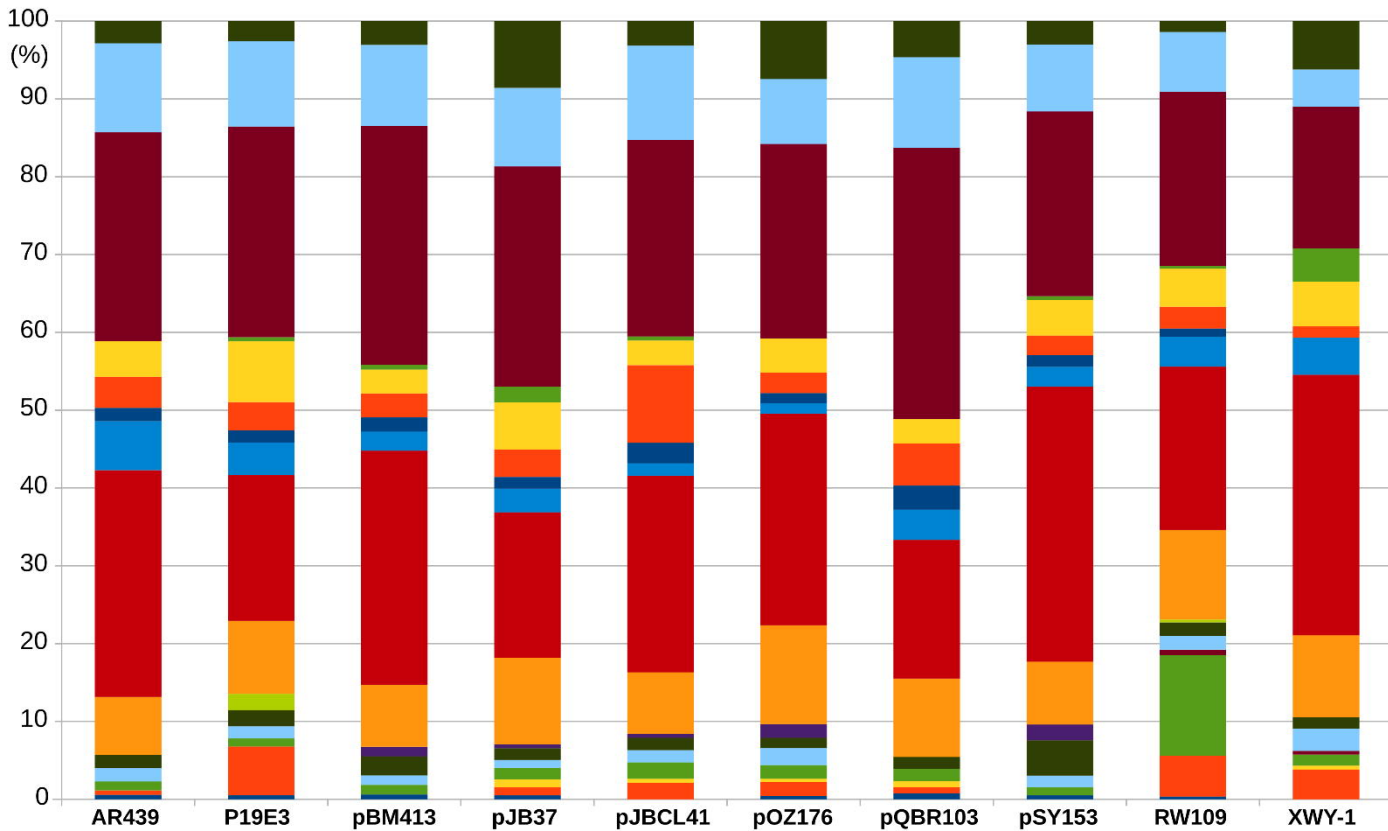

## COG categories

- U: Intracellular trafficking and secretion
- T: Signal Transduction
- S: Unknown function
- Q: Secondary Structure
- P: Inorganic ion transport and metabolism
- PTM, protein turnover, chaperone functions
- N: Cell motility
- M: Cell wall/membrane/envelop biogenesis
- L: Replication and repair
- K: Transcription
- J: Translation
- I: Lipid metabolism
- H: Coenzyme metabolism
- G: Carbohydrate metabolism and transport
- F: Nucleotide metabolism and transport
- E: Amino Acid metabolism and transport
- D: Cell cycle control and mitosis
- C: Energy production and conversion
- A: RNA processing and modification

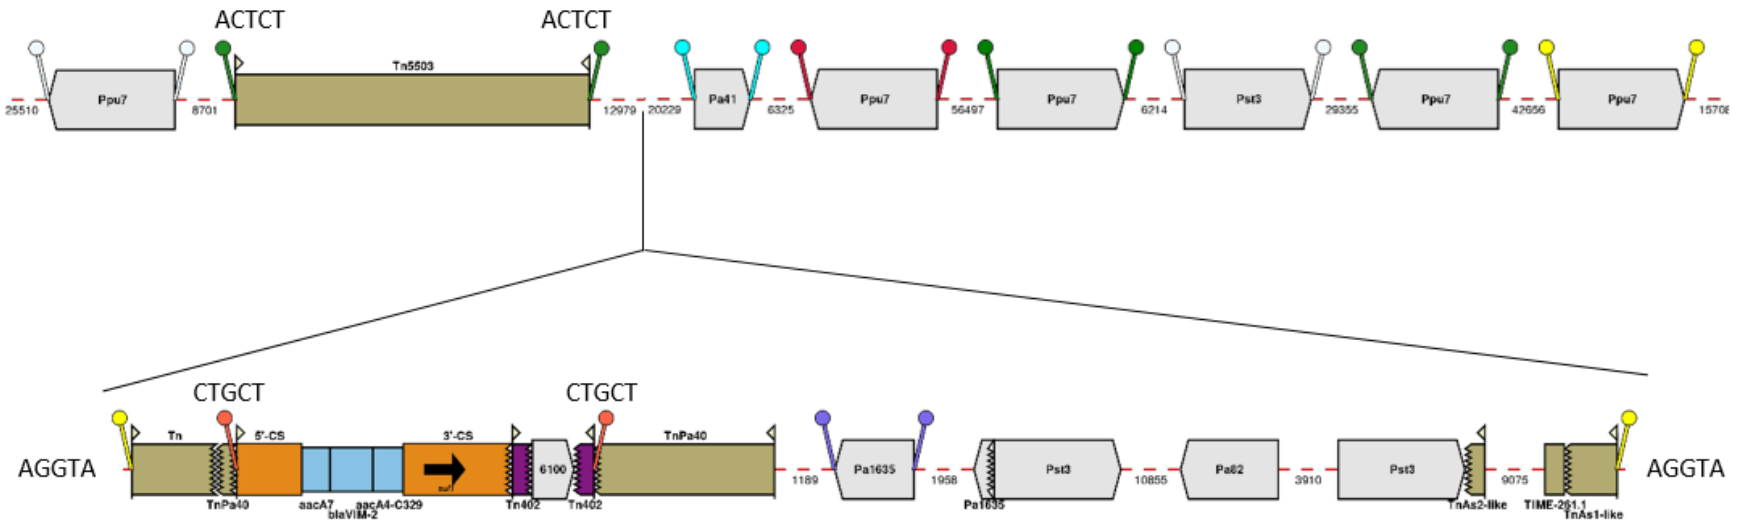

Source: https://www.biorxiv.org/content/10.1101/601898v1.full.pdf
